# Supplementary material
Source: HighWire-hosted journal article supplement (https://www.annfammed.org/highwire/filestream/8290/field_highwire_adjunct_files/4/Shaw_Supp_Fig_2.pdf)
Supplement: Shaw_Supp_Fig_2.pdf [file Shaw_Supp_Fig_2.pdf]

**Online Supplementary Material**

Shaw EK, Ohman-Strickland PA, Piasecki A, et al. Effects of facilitated team meetings and learning collaboratives on colorectal cancer screening rates in primary care practices: a cluster randomized trial. *Ann Fam Med.* 2013;11(3):220-228.

<http://www.annfammed.org/content/11/3/220>

**Supplemental Figure 2. Patient recruitment.**

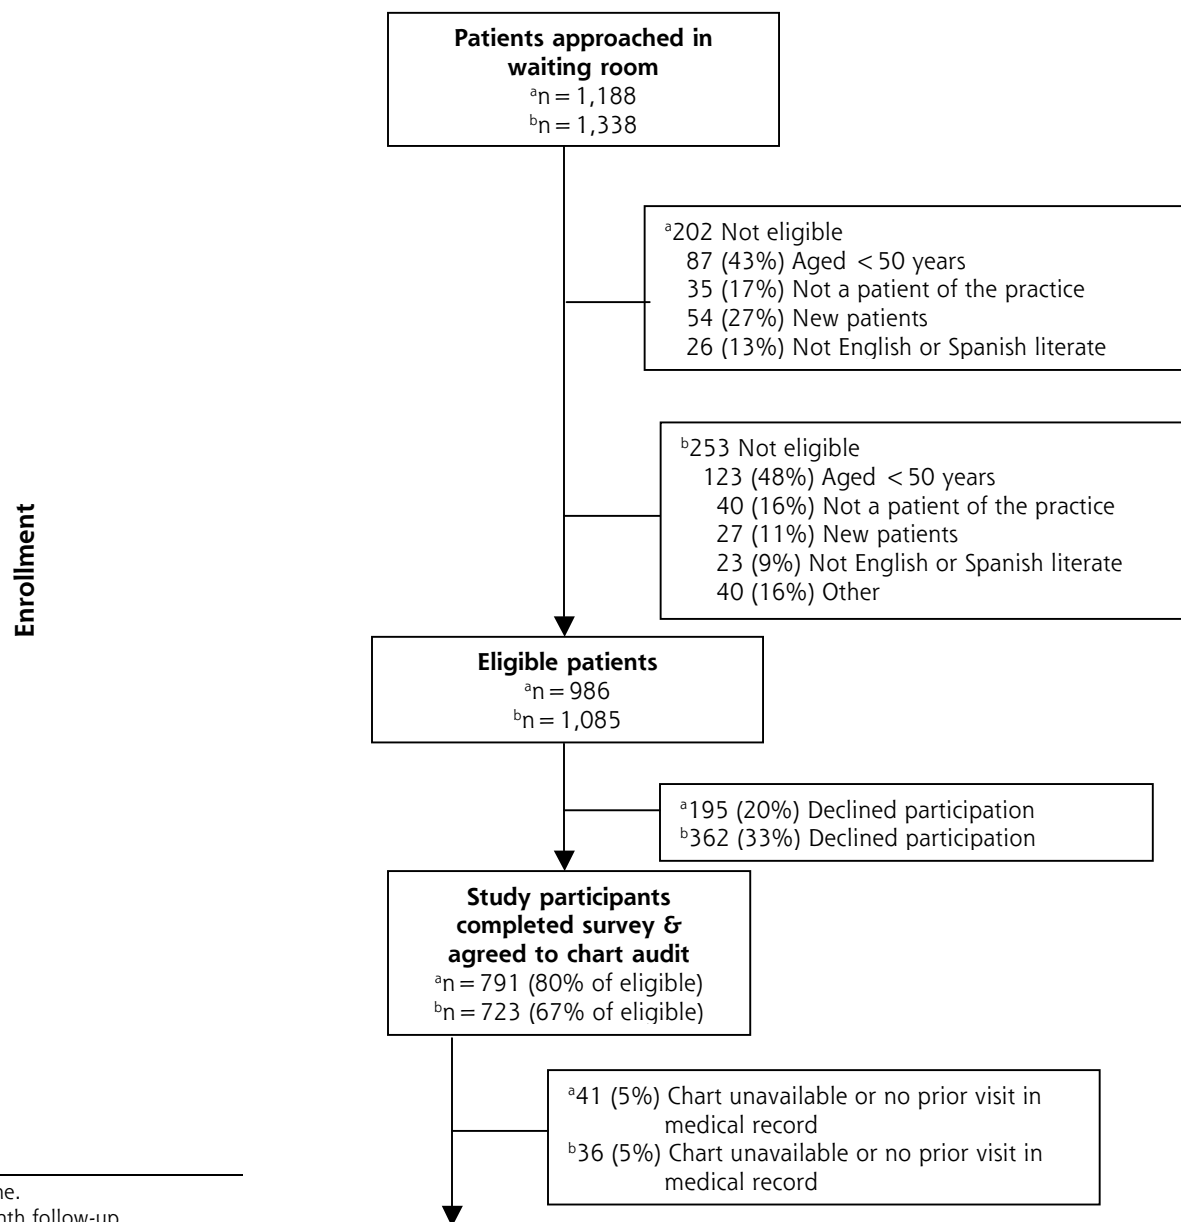

<sup>a</sup> Baseline.  
<sup>b</sup> 12-month follow-up.

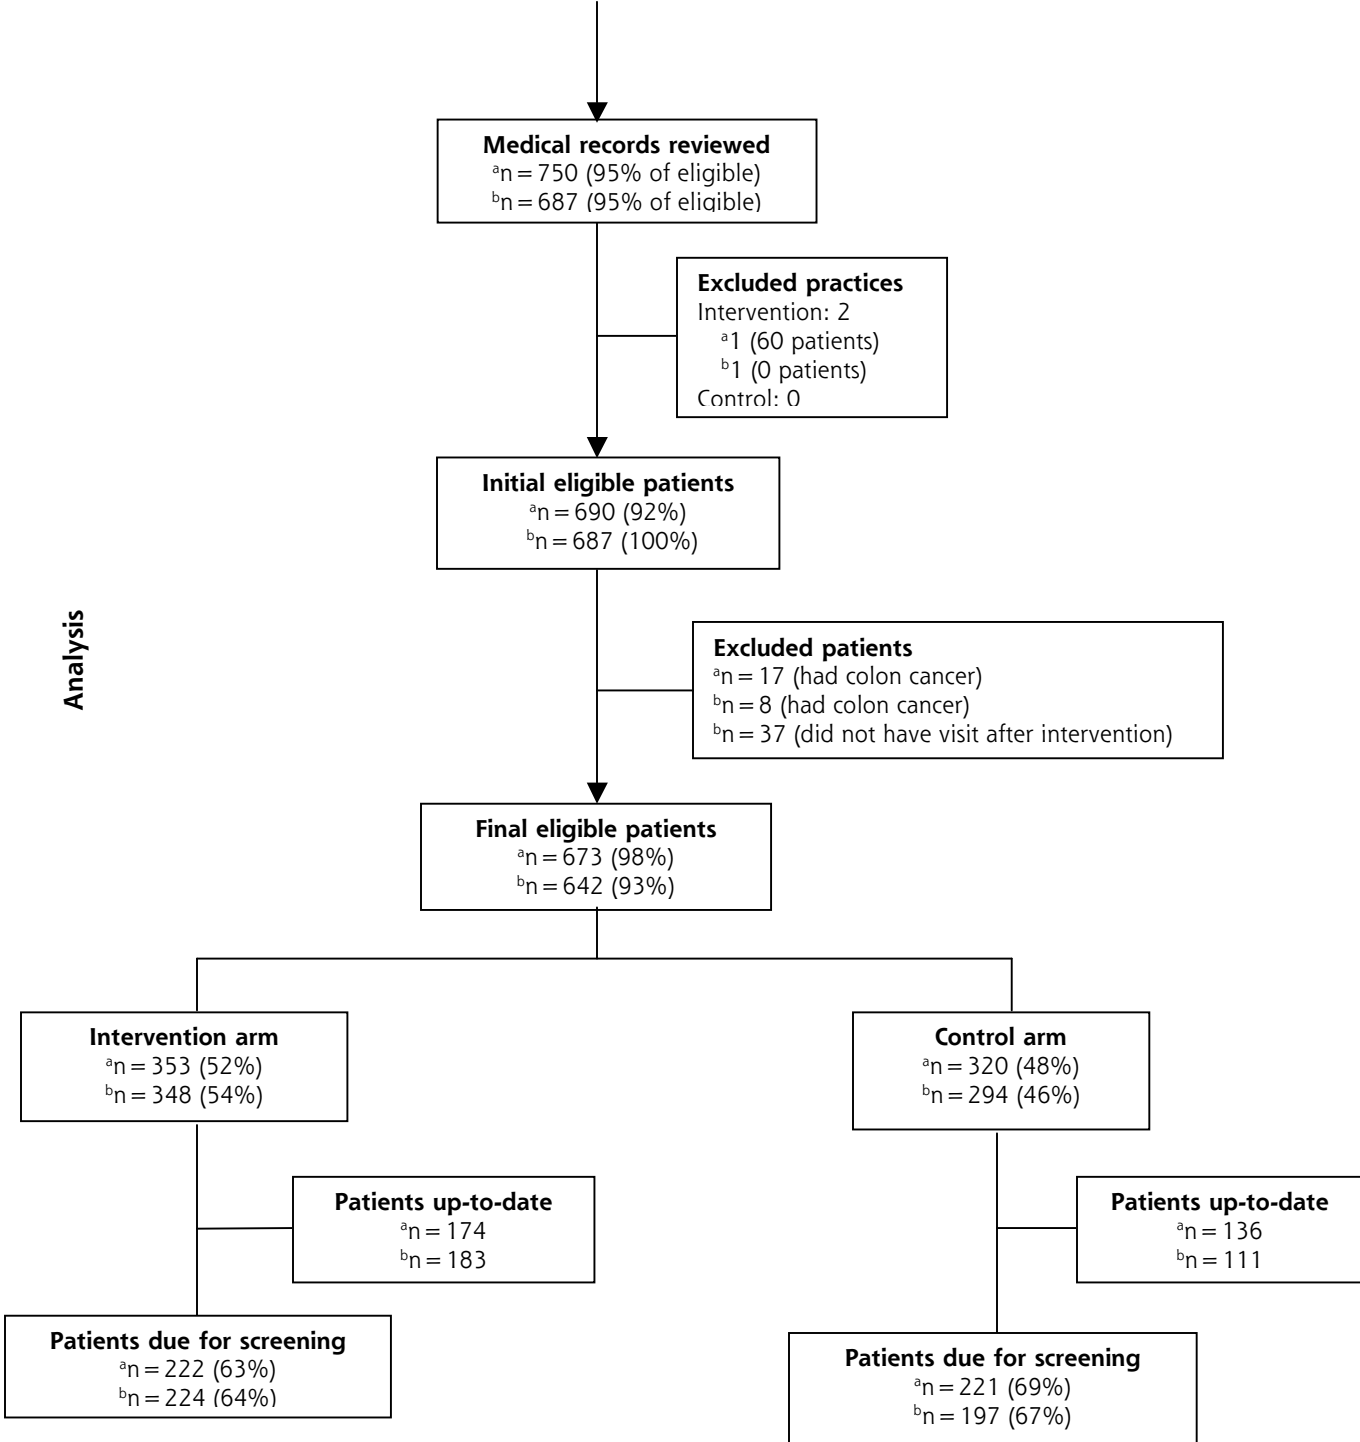

<sup>a</sup> Baseline.  
<sup>b</sup> 12-month follow-up.
